# Supplementary material
Source: Royal Society of Chemistry journal article supplement (doi:10.1039/d6ee01515h)
Supplement: d6ee01515h1.pdf [file d6ee01515h1.pdf]

## Supporting Information

### **Strain-mediated grain-boundary reconstruction unlocks high near-room-temperature thermoelectric performance in Mg<sub>3</sub>Sb<sub>2</sub>-based alloy**

Gang Wu<sup>1,3</sup>, Airan Li<sup>1,3</sup>, Harish Subramania<sup>1</sup>, Xinzhi Wu<sup>1</sup>, Longquan Wang<sup>1</sup>, Jiankang Li<sup>1,2</sup>, Fei Frank Yun<sup>1</sup>, Takao Mori<sup>1,2\*</sup>

1. Research Center for Materials Nanoarchitectonics (MANA), National Institute for Materials Science (NIMS), Tsukuba, 305-0044, Japan.

2. Graduate School of Pure and Applied Science, University of Tsukuba, 1-1-1 Tennodai, Tsukuba, Ibaraki 305-8671, Japan.

3. These authors contributed equally to this work.

Corresponding author, email: MORI.Takao@nims.go.jp

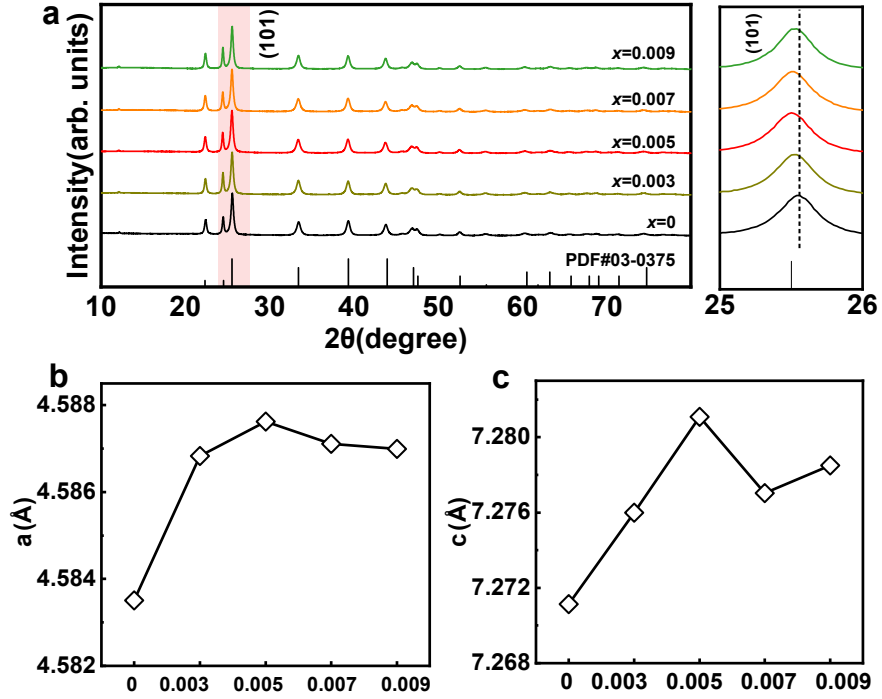

**Supplementary Fig. 1. XRD patterns.** **a** The XRD patterns of  $\text{Mg}_{3.2(1-x)}\text{Cu}_x\text{Ga}_x\text{Sb}_{1.5(1-x)}\text{Bi}_{0.5(1-x)}\text{Te}_{2x}$  ( $x=0, 0.003, 0.005, 0.007, 0.009$ ) samples at room temperature. The lattice parameters of **b**  $a$ -axis and **c**  $c$ -axis.

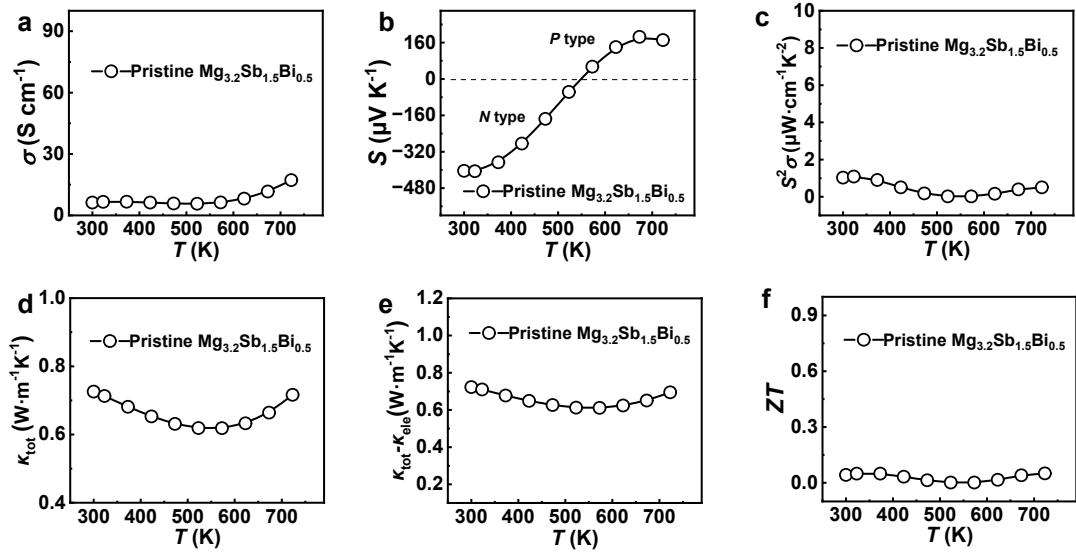

**Supplementary Fig. 2.** The thermoelectric properties of pristine sample. **a**  $\sigma$ , **b**  $S$ , **c**  $S^2\sigma$ , **d**  $\kappa_{\text{tot}}$ , **e**  $\kappa_{\text{tot}}-\kappa_{\text{lat}}$ , **f**  $ZT$  value.

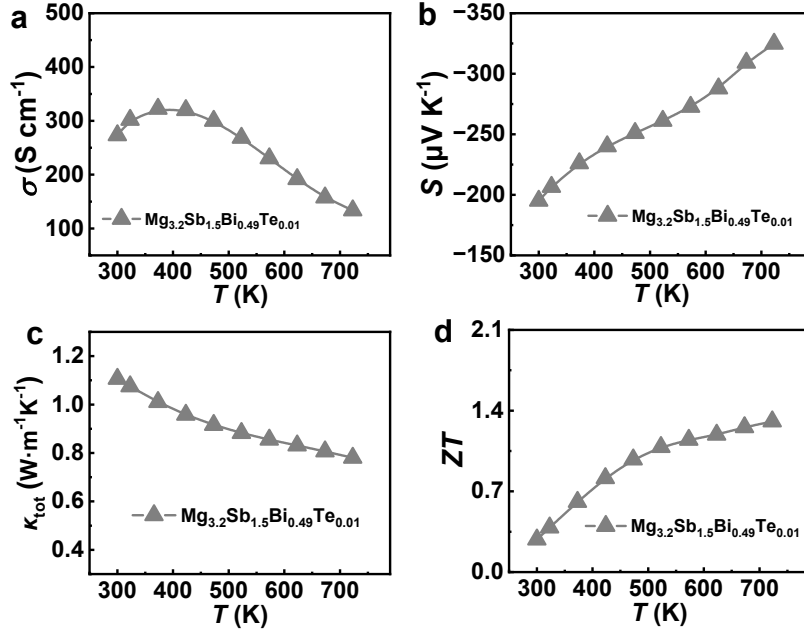

**Supplementary Fig. 3.** The thermoelectric properties of  $\text{Mg}_{3.2}\text{Sb}_{1.5}\text{Bi}_{0.49}\text{Te}_{0.01}$ . **a**  $\sigma$ , **b**  $S$ , **c**  $\kappa_{\text{tot}}$ , **d**  $ZT$  value.

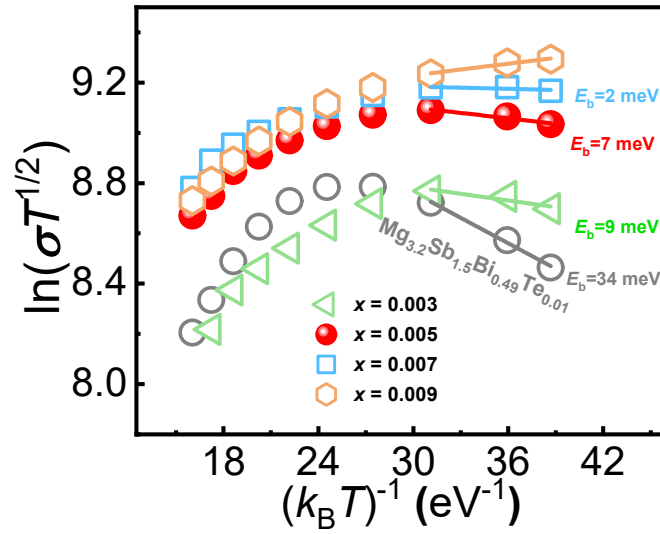

**Supplementary Fig. 4.** The calculated grain boundary potential barrier ( $E_b$ ) by linear extrapolated from the  $\ln(\sigma T^{1/2})$  as a function of  $1/k_B T$  curve.

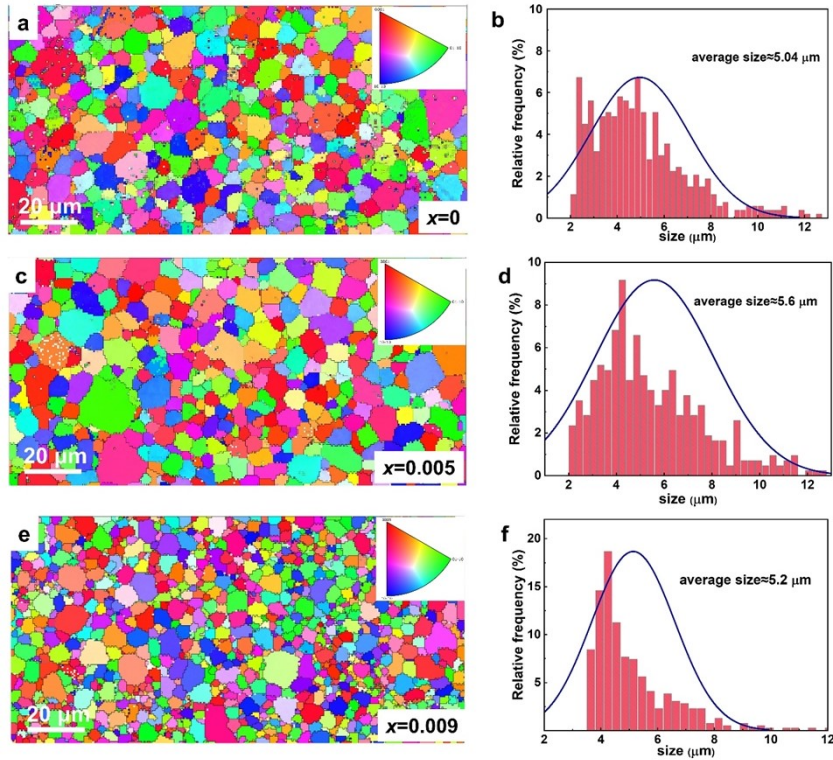

**Supplementary Fig. 5.** The microstructural evolution. The EBSD graphs and its grain size distribution, **a-b**  $x=0$ , **c-d**  $x=0.005$ , **e-f**  $x=0.009$ .

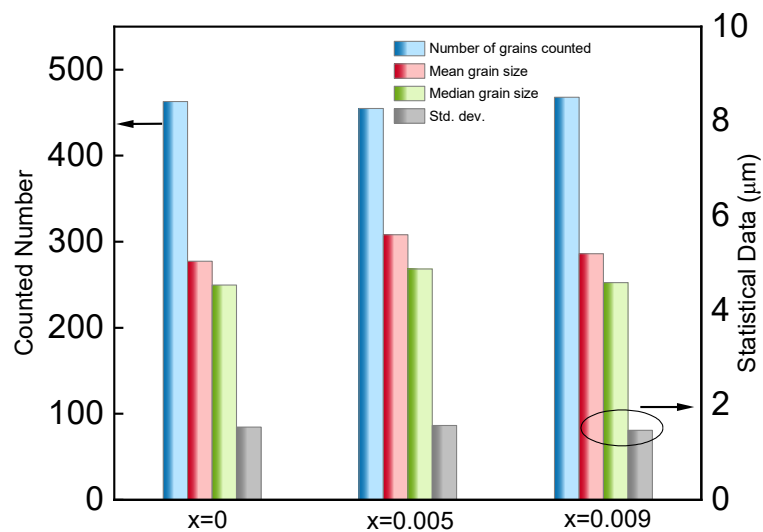

**Supplementary Fig. 6.** The number of grains counted, mean grain size, median grain size and standard deviation for  $x=0$ ,  $x=0.005$  and  $x=0.009$  samples.

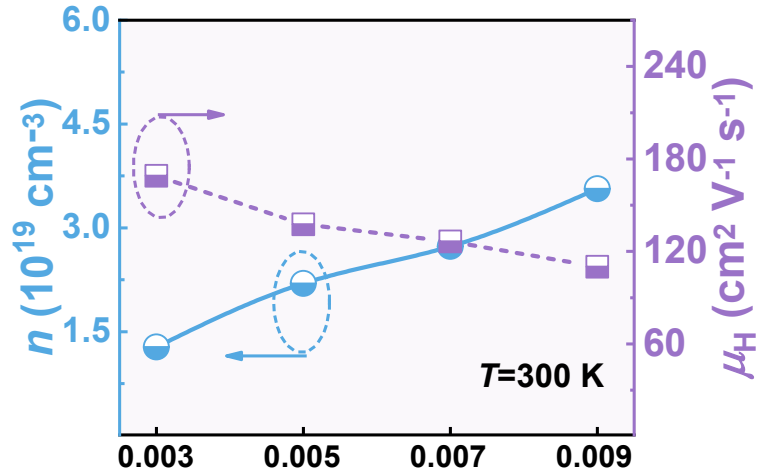

**Supplementary Fig. 7.** The changes in carrier concentration ( $n$ ) and carrier mobility ( $\mu$ ) of samples.

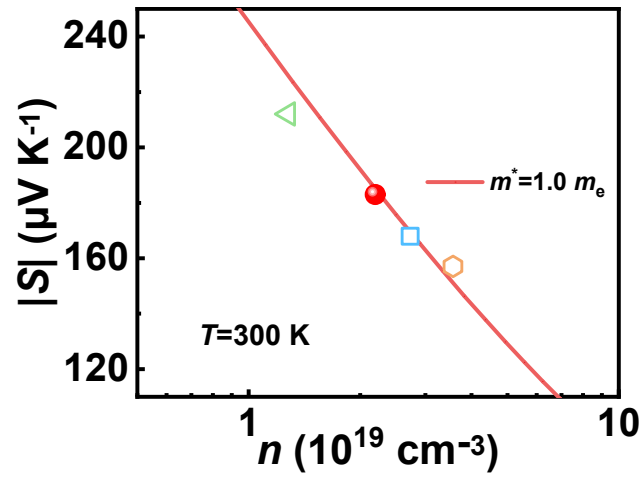

**Supplementary Fig. 8.** The curve between carrier concentration and Seebeck coefficient based on single parabolic band model.

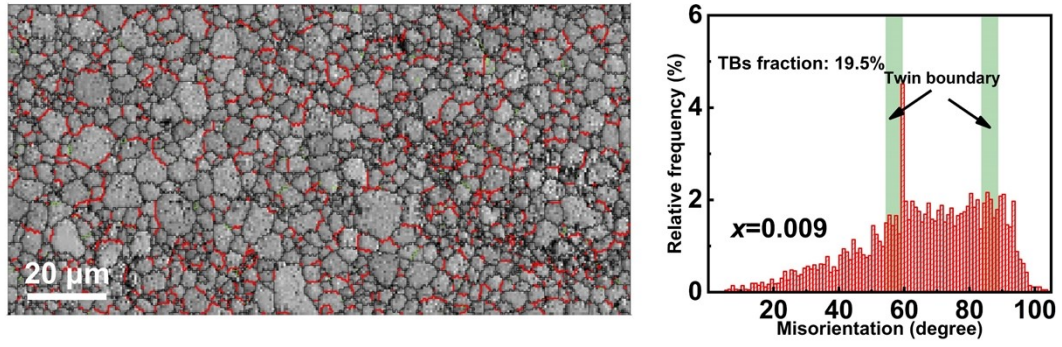

**Supplementary Fig. 9.** The grain misorientation distributions and corresponding morphology maps for  $x=0.009$  sample. TBs are marked in red.

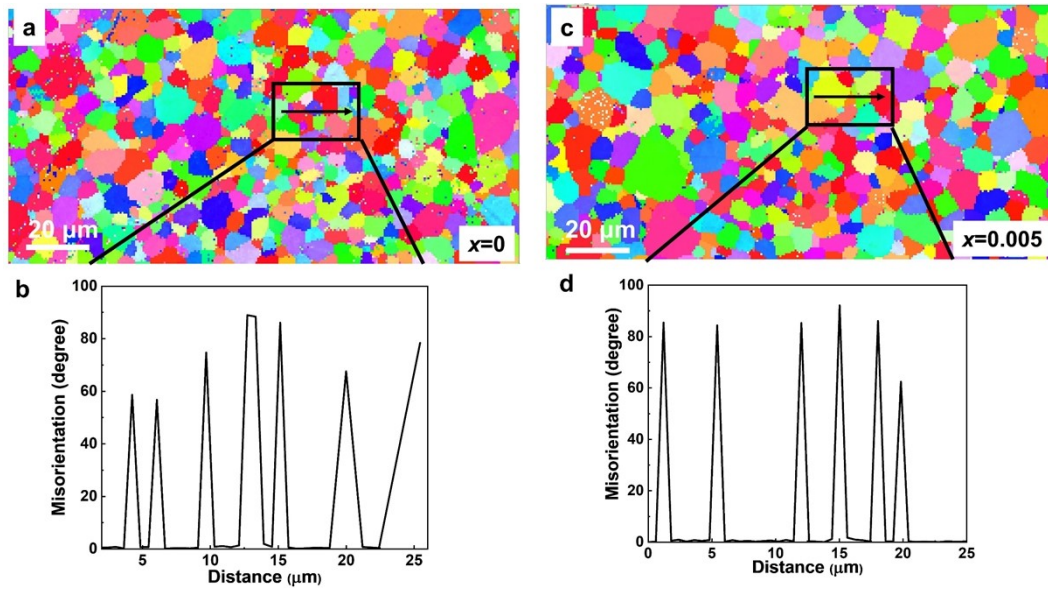

**Supplementary Fig. 10.** The magnified misorientation analysis for **a-b**  $x=0$ , and **c-d**  $x=0.005$ .

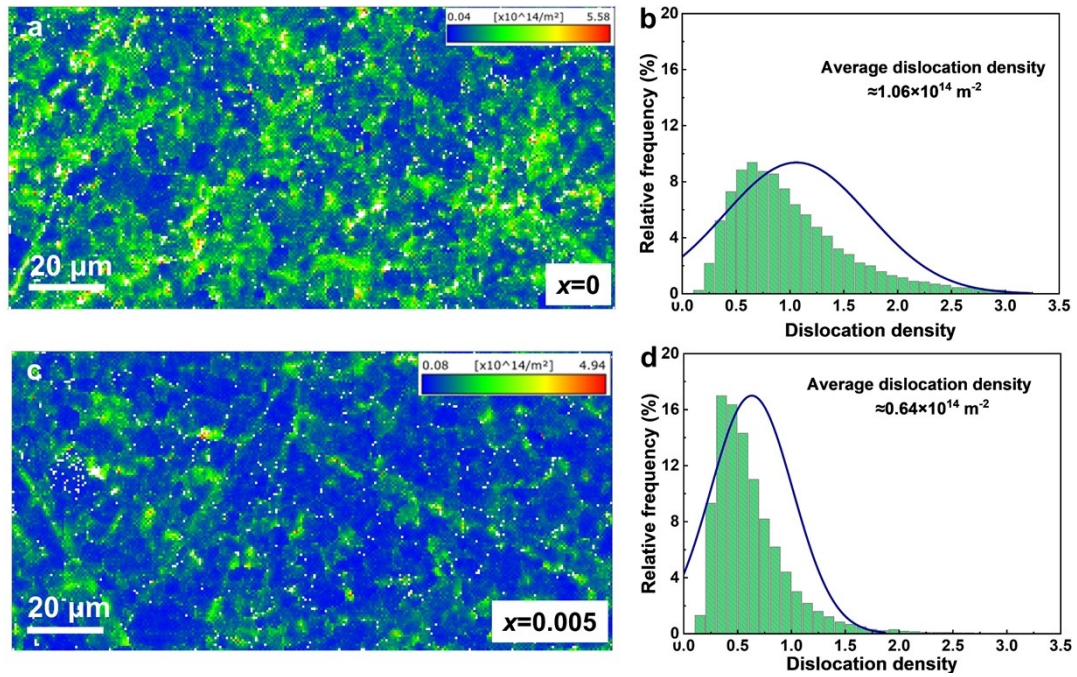

**Supplementary Fig. 11.** The dislocation density distribution for **a-b**  $x=0$ , and **c-d**  $x=0.005$ .

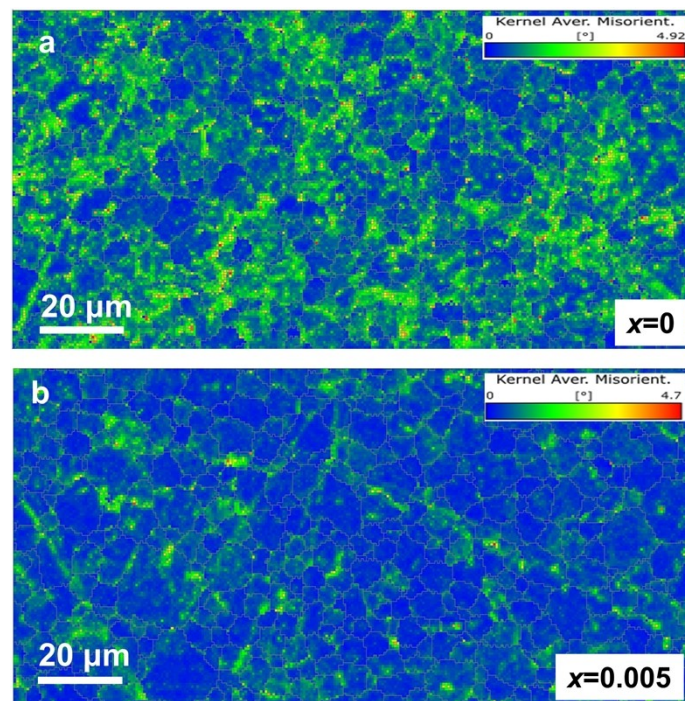

**Supplementary Fig. 12.** The Kernel Average Misorientation distribution map for **a**  $x=0$  and **c**  $x=0.005$  samples.

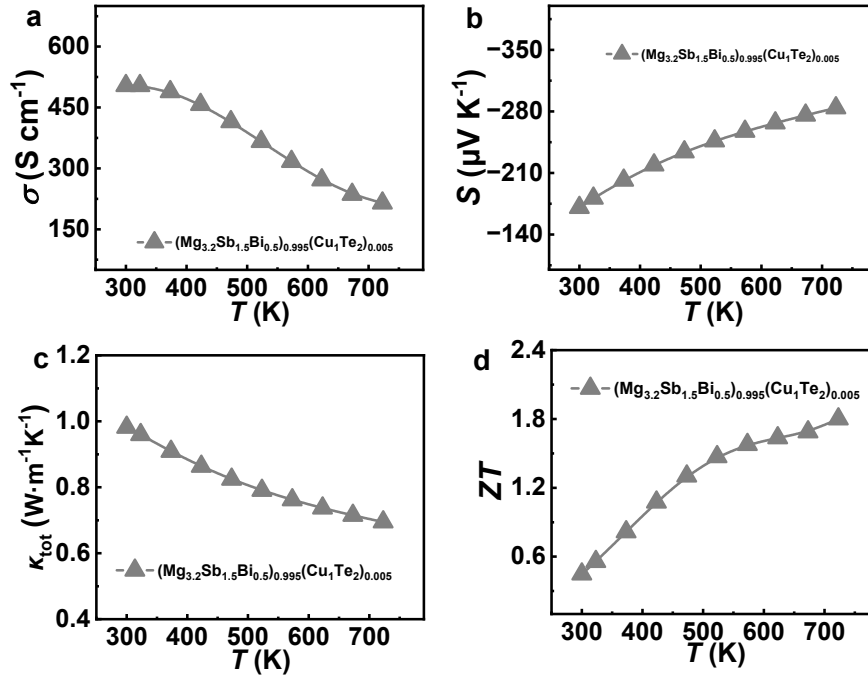

**Supplementary Fig. 13.** The thermoelectric properties of nominal component  $(\text{Mg}_{3.2}\text{Sb}_{1.5}\text{Bi}_{0.5})_{0.995}(\text{Cu}_1\text{Te}_2)_{0.005}$  sample. **a**  $\sigma$ , **b**  $S$ , **c**  $\kappa_{\text{tot}}$ , **d**  $ZT$  value.

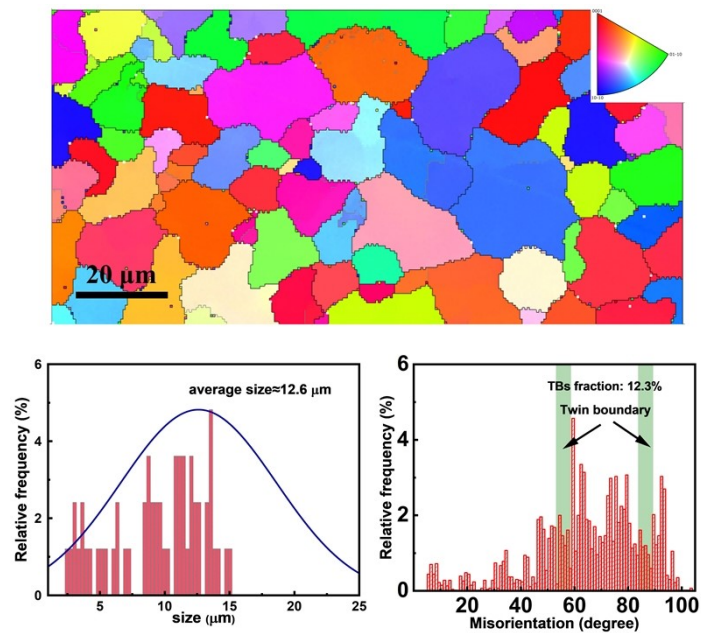

**Supplementary Fig. 14.** The grain size and grain misorientation distributions for nominal component  $(\text{Mg}_{3.2}\text{Sb}_{1.5}\text{Bi}_{0.5})_{0.995}(\text{Cu}_1\text{Te}_2)_{0.005}$  sample.

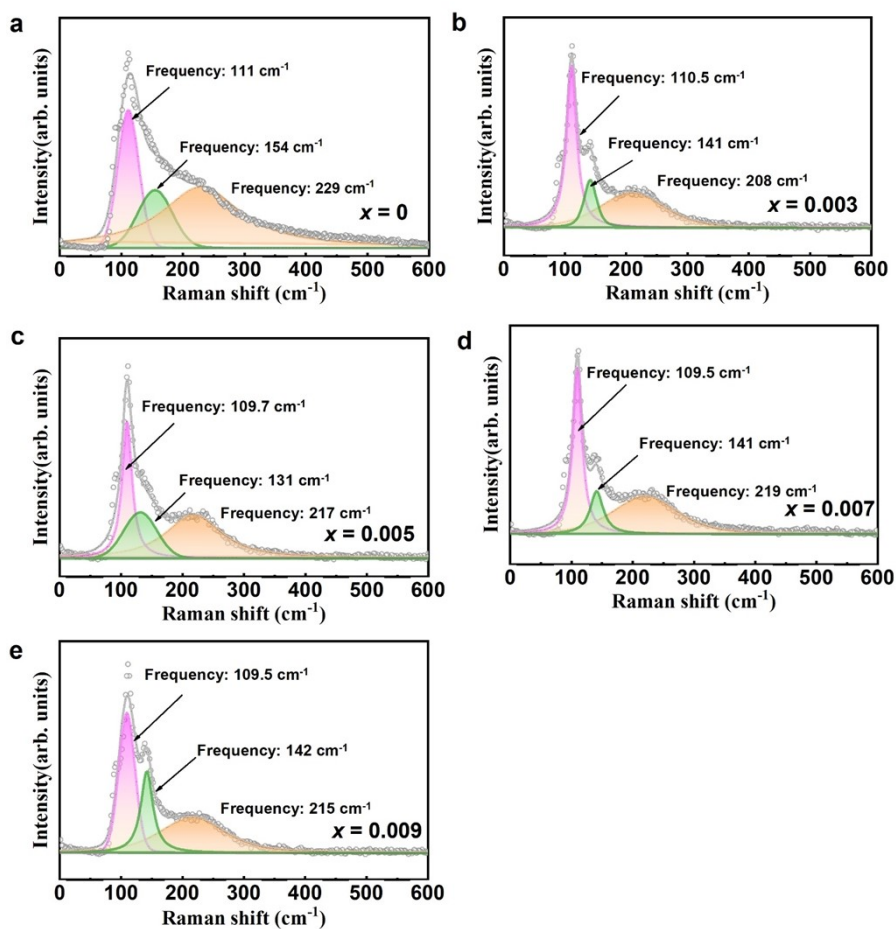

**Supplementary Fig. 15.** Raman spectrum for the  $x=0, 0.003, 0.005, 0.007, 0.009$  samples at room temperature.

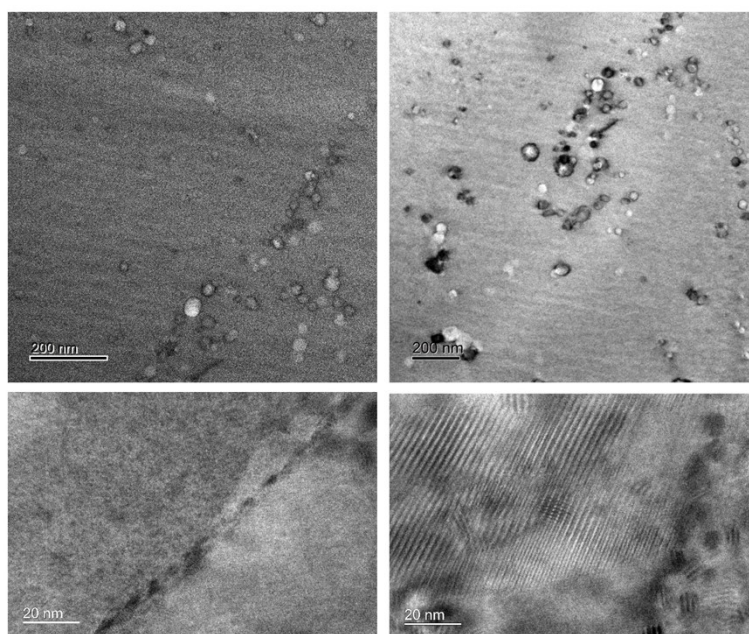

**Supplementary Fig. 16.** The STEM microstructural analysis of the  $x=0.005$  sample.

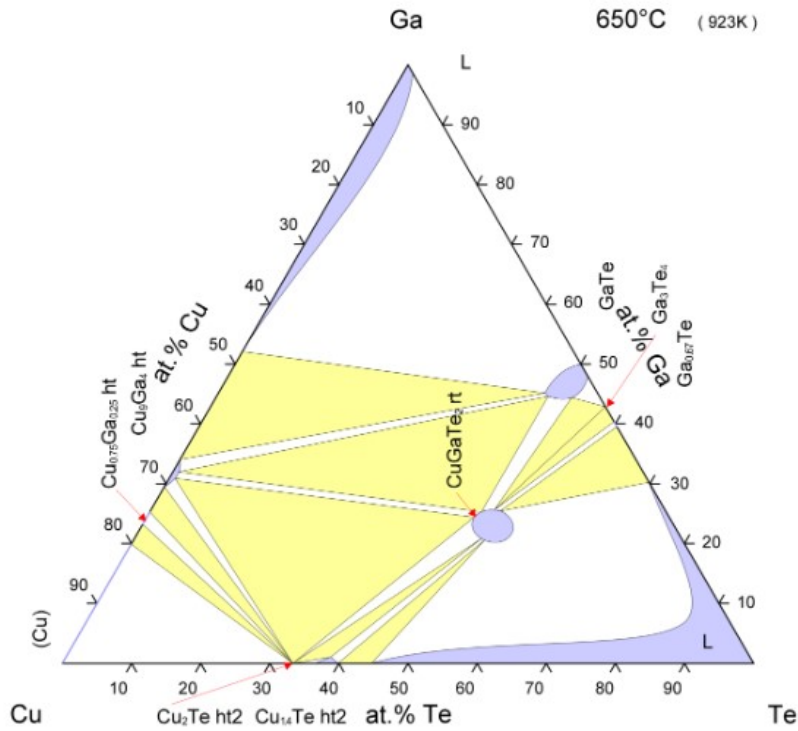

**Supplementary Fig. 17.** Isothermal Cu-Ga-Te ternary phase diagram at 923 K, illustrating the equilibrium phase fields and tie-triangle regions involving  $\text{CuGaTe}_2$  and Cu-Ga-rich phases.<sup>[1]</sup>

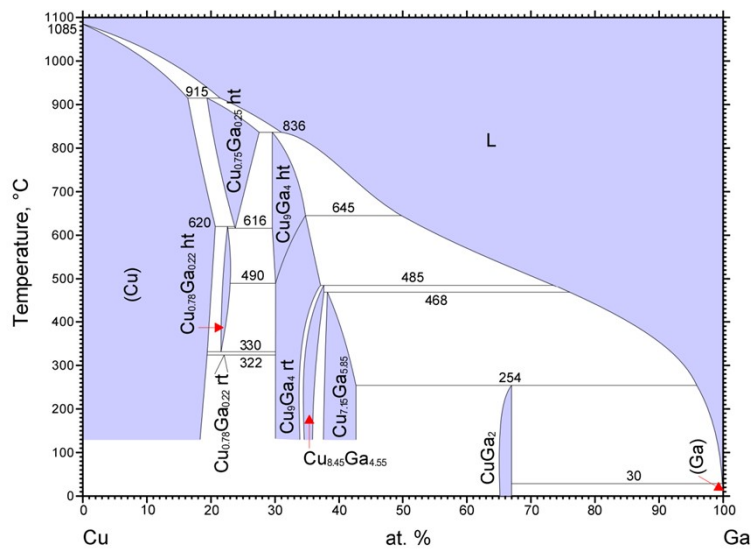

**Supplementary Fig. 18.** Binary Cu-Ga phase diagram showing the equilibrium phase regions and stable intermetallic compounds ( $\text{Cu}_9\text{Ga}_4$ ,  $\text{Cu}_{0.78}\text{Ga}_{0.22}$ ,  $\text{CuGa}_2$ ), providing thermodynamic guidance for identifying Cu-Ga precipitates.<sup>[2]</sup>

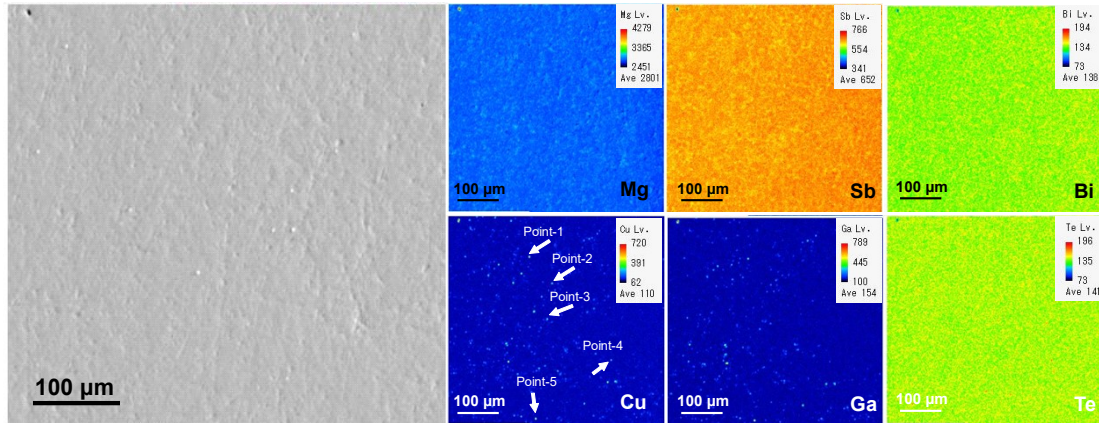

**Supplementary Fig. 19.** The EPMA elemental mapping of the  $x=0.005$  sample showing homogeneous distributions of Mg, Sb, Bi and Te, while Cu and Ga exhibit localized enrichment, indicating the formation of ultrafine Cu-Ga precipitates.

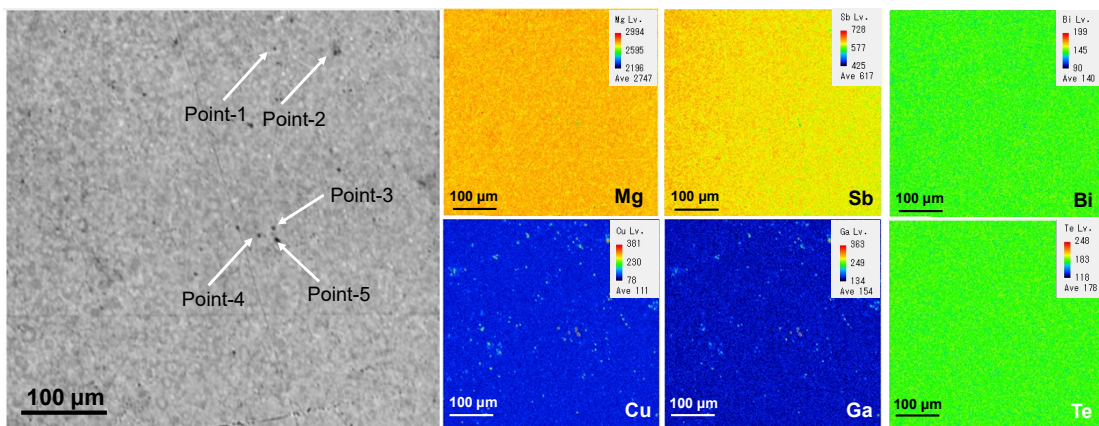

**Supplementary Fig. 20.** The EPMA elemental mapping of the  $x=0.009$  sample showing homogeneous distributions of Mg, Sb, Bi and Te, whereas Cu and Ga exhibit pronounced large localized enrichment, indicating the formation of micron-sized Cu-Ga precipitates.

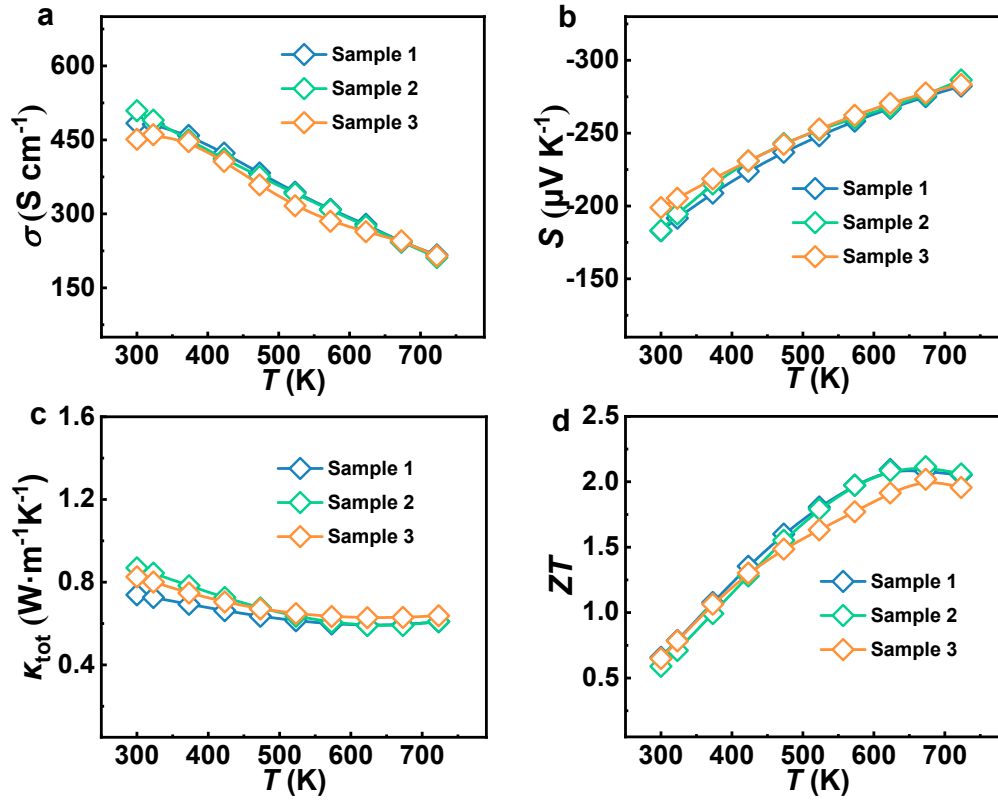

**Supplementary Fig. 21.** The thermoelectric properties of multiple samples with the same composition  $x=0.005$ . **a**  $\sigma$ , **b**  $S$ , **c**  $\kappa_{\text{tot}}$ , **d**  $ZT$  value.

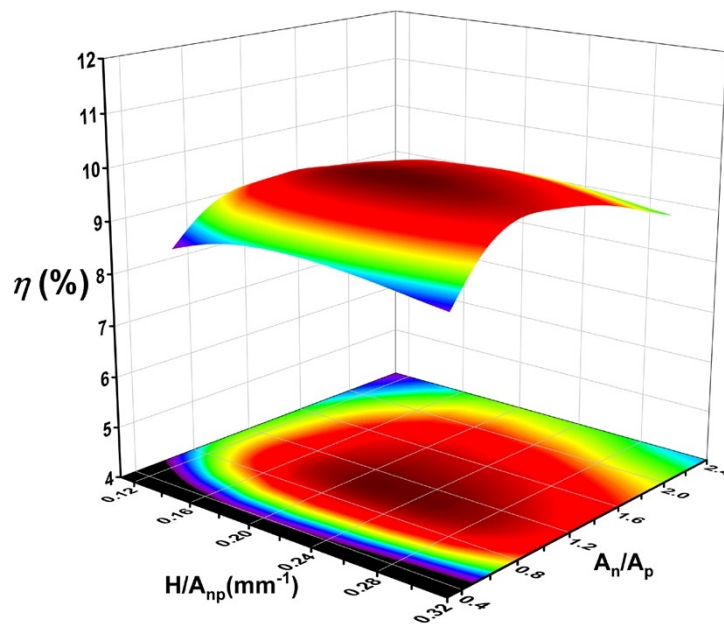

**Supplementary Fig. 22.** Theoretical conversion efficiency ( $\eta$ ) as a function of module height and cross-sectional area.

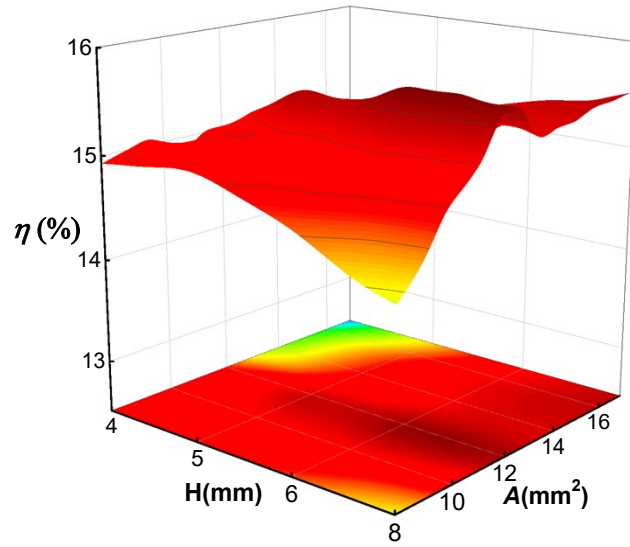

**Supplementary Fig. 23.** Theoretical conversion efficiency ( $\eta$ ) as a function of single-leg height and cross-sectional area.

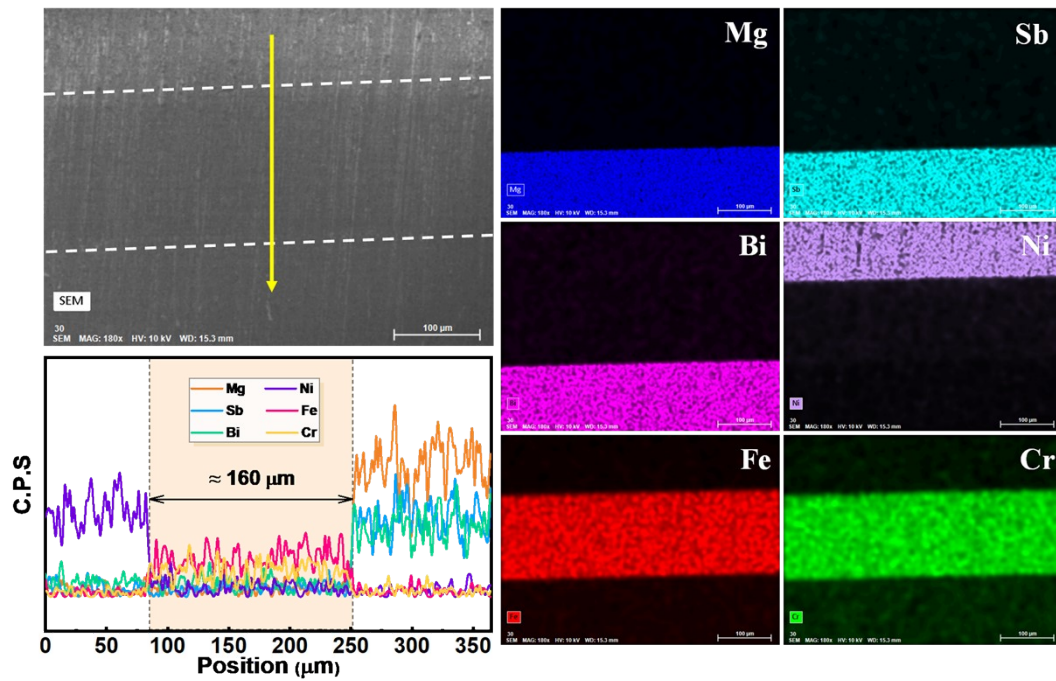

**Supplementary Fig. 24.** The SEM and its elemental mapping of TE leg near the interface between the material and barrier layer.

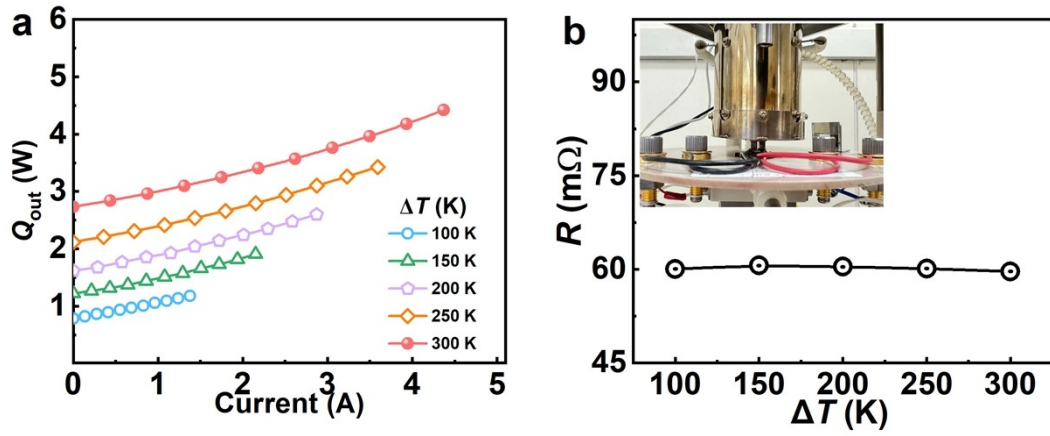

**Supplementary Fig. 25.** **a** The data of a TE module by current dependence heat flow, **b** the internal resistance.

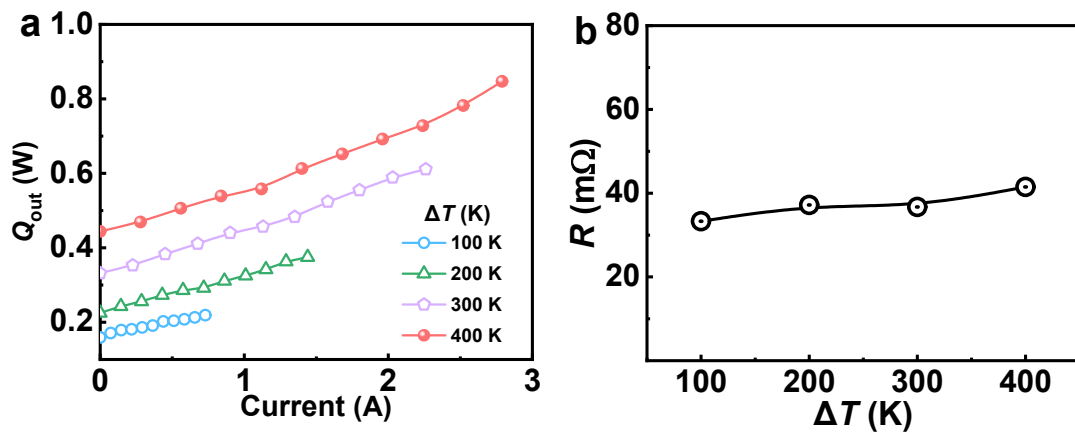

**Supplementary Fig. 26.** **a** The data of a single leg by current dependence heat flow, **b** the internal resistance.

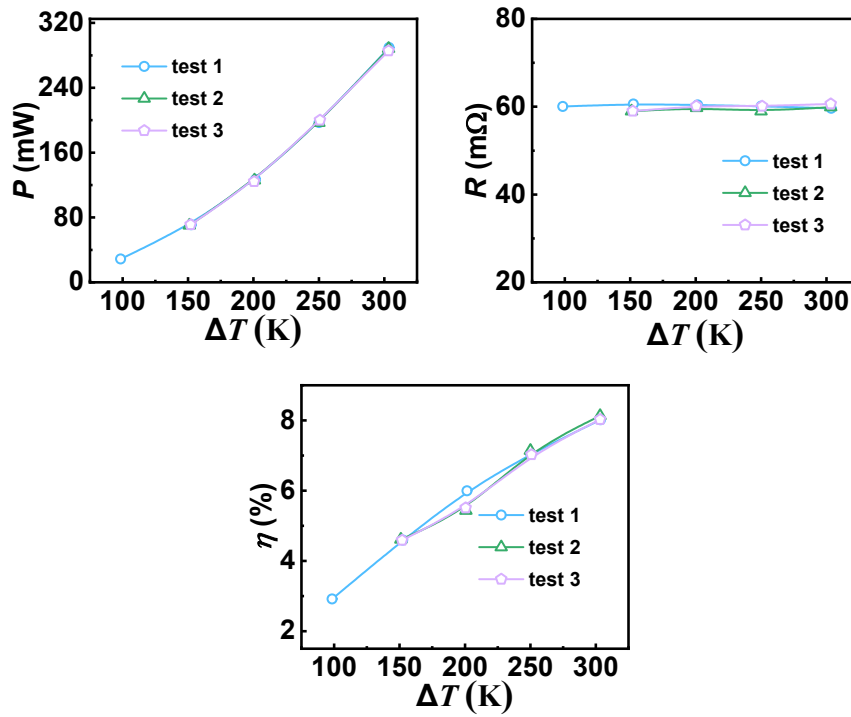

**Supplementary Fig. 27.** The repeated test of TE module under different temperature differences.

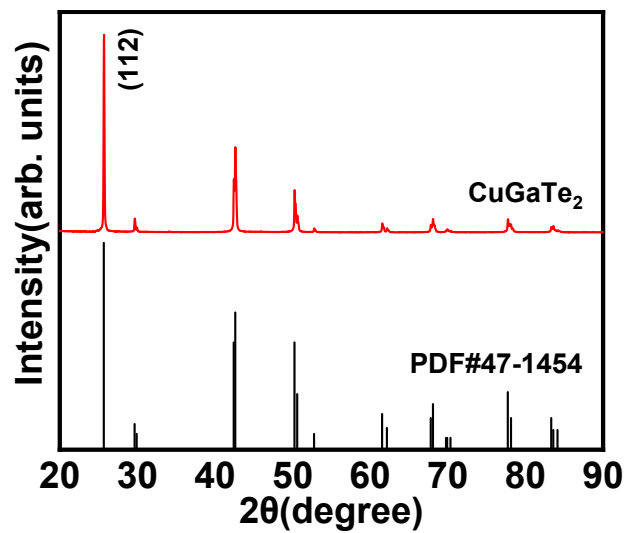

**Supplementary Fig. 28.** The XRD pattern of synthesized  $\text{CuGaTe}_2$  sample at room temperature.

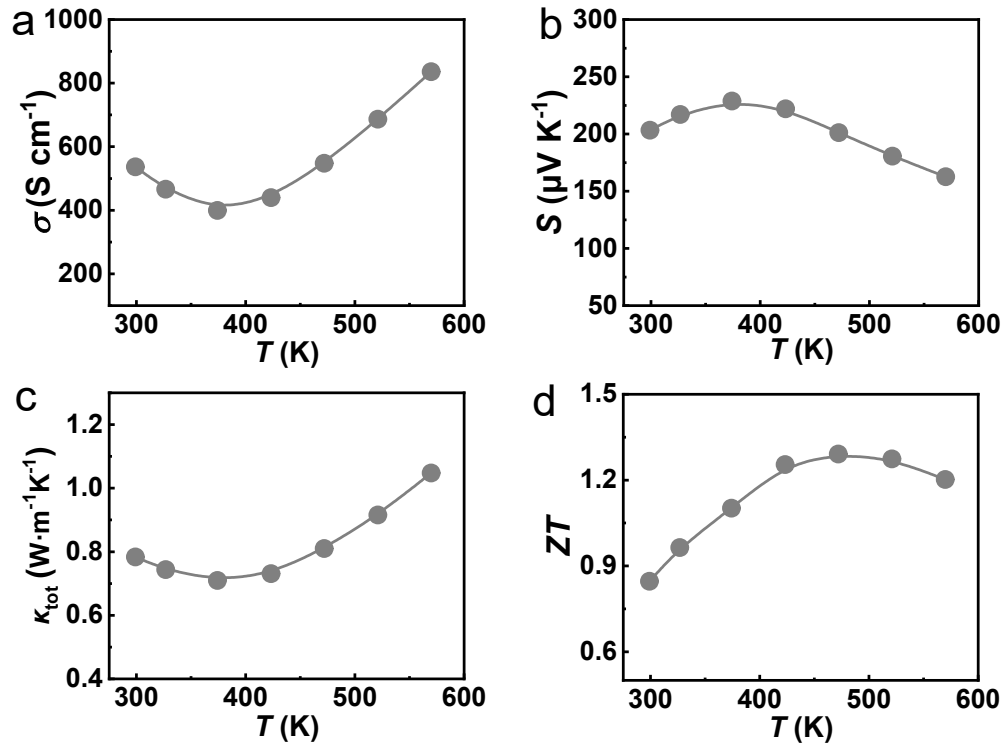

**Supplementary Fig. 29.** The properties of p-type MgAgSb properties. **a**  $\sigma$ , **b**  $S$ , **c**  $\kappa_{\text{tot}}$ , **d**  $ZT$  value.

**Supplementary Table 1.** The number of grains counted, mean grain size, median grain size and standard deviation for  $x=0$ ,  $x=0.005$ ,  $x=0.009$  samples.

| sample    | Number of grains counted | Mean ( $\mu\text{m}$ ) | Median ( $\mu\text{m}$ ) | Std. dev. ( $\mu\text{m}$ ) |
|-----------|--------------------------|------------------------|--------------------------|-----------------------------|
| $x=0$     | 463                      | 5.04                   | 4.54                     | 1.54                        |
| $x=0.005$ | 455                      | 5.6                    | 4.88                     | 1.57                        |
| $x=0.009$ | 468                      | 5.2                    | 4.59                     | 1.47                        |

**Supplementary Table 2. EPMA point analysis results in the  $x=0.005$  sample.**

| Position | Mg (at.%) | Sb (at.%) | Bi (at.%) | Cu (at.%) | Ga (at.%) | Te (at.%) |
|----------|-----------|-----------|-----------|-----------|-----------|-----------|
| 1        | 61.2      | 24.2      | 7.2       | 6.1       | 1.0       | 0.29      |
| 2        | 58.0      | 25.0      | 7.3       | 6.0       | 3.3       | 0.30      |
| 3        | 55.0      | 20.6      | 5.5       | 13.1      | 5.6       | 0.24      |
| 4        | 60.9      | 22.1      | 6.2       | 9.6       | 1.0       | 0.28      |
| 5        | 51.5      | 15.7      | 4.1       | 20.1      | 8.4       | 0.19      |

**Supplementary Table 3. EPMA point analysis results in the  $x=0.009$  sample.**

| Position | Mg (at.%) | Sb (at.%) | Bi (at.%) | Cu (at.%) | Ga (at.%) | Te (at.%) |
|----------|-----------|-----------|-----------|-----------|-----------|-----------|
| 1        | 66.0      | 25.3      | 7.1       | 0.84      | 0.42      | 0.16      |
| 2        | 64.7      | 26.3      | 7.3       | 0.76      | 0.55      | 0.17      |
| 3        | 64.2      | 24.9      | 8.3       | 1.86      | 0.46      | 0.16      |
| 4        | 69.4      | 23.6      | 6.5       | 0.12      | 0.09      | 0.15      |
| 5        | 64.4      | 26.1      | 7.8       | 0.50      | 0.85      | 0.16      |

**Supplementary Tables 4. Parameters for the  $\kappa_{\text{lat}}$  calculation of  $\text{Mg}_3\text{Sb}_2$ -based materials in Debye-Callaway model.**

| Parameters | Descriptions                                       | Values                              |
|------------|----------------------------------------------------|-------------------------------------|
| $A_N$      | Fitted parameter of U process                      | 5.7                                 |
| $\Gamma_M$ | The mass disorder scattering parameter             | 0.1094                              |
| $\Gamma_S$ | The strain field disorder parameter                | 0.2344                              |
| $d$        | Average grain size                                 | 5.6 $\mu\text{m}$                   |
| $N_D$      | Dislocation density                                | $6.4 \times 10^{15} \text{ m}^{-2}$ |
| $B_D$      | Burger's vector                                    | 4.6 $\text{\AA}$                    |
| $\gamma$   | Grüneisen parameter                                | 2.11                                |
| $v_l$      | Longitudinal sound velocity                        | 3677 $\text{m s}^{-1}$              |
| $v_t$      | Transverse sound velocity                          | 1781 $\text{m s}^{-1}$              |
| $N_p$      | Number density of precipitates                     | $6.6 \times 10^{20} \text{ m}^{-3}$ |
| $R$        | Average radius for the precipitates                | $25 \times 10^{-9} \text{ m}$       |
| $\Delta D$ | Density difference between matrix and precipitates | 3600 $\text{Kg m}^{-3}$             |
| $K$        | Bulk modulus of $\text{Mg}_3\text{Sb}_2$           | 35 GPa                              |
| $\nu_p$    | Poisson's ratio                                    | 0.35                                |

## Lattice strain is evaluated through the Williamson-Hall analysis.

The Williamson-Hall method is employed to estimate the internal strain of the samples.<sup>[3]</sup>

$$\beta \cos \theta = \varepsilon_{XRD} 4 \sin \theta + \frac{\lambda}{d_{XRD}} \#(S1)$$

where  $\beta$ ,  $\theta$ ,  $\lambda$ ,  $\varepsilon_{XRD}$ ,  $d_{XRD}$  stand for the full-width half maximum (in radians), diffraction angle of peak, wavelength of the radiation (1.54056 Å), internal strain and crystallite domain size, respectively.

## Debye-Callaway model

The Debye-Callaway model is applied to analyze the contributions of various phonon scattering mechanisms, as expressed by the following equation:<sup>[4]</sup>

$$\kappa_{lat} = \frac{k_B}{2\pi^2\nu} \left( \frac{k_B T}{\hbar} \right)^3 \int_0^{\frac{\theta_D}{T}} \tau_{tot}(x) \frac{x^4 e^x}{(e^x - 1)^2} dx \#(S2)$$

Together with the coefficient, the integrand characterizes the spectral lattice thermal conductivity ( $\kappa_s$ ), expressed as:

$$\kappa_s = \frac{k_B}{2\pi^2\nu} \left( \frac{k_B T}{\hbar} \right)^3 \tau_{tot}(x) \frac{x^4 e^x}{(e^x - 1)^2} \#(S3)$$

where  $x = \hbar\omega/k_B T$ ,  $k_B$ ,  $\nu$ ,  $\hbar$ ,  $\theta_D$ ,  $\tau_{tot}$  represent the reduced phonon frequency, Boltzmann constant, mean sound velocity, reduced Planck constant, Debye temperature and phonon relaxation time, respectively. Here, this model mainly analyzes the phonon-phonon Umklapp process (U), grain boundary scattering (B), point defect scattering (PD), dislocations scattering (DC), strain scattering (DS) and nanoprecipitates (NP).<sup>[5]</sup>

$$\tau_{tot}^{-1} = \tau_U^{-1} + \tau_{PD}^{-1} + \tau_B^{-1} + \tau_{DC}^{-1} + \tau_{DS}^{-1} + \tau_{NP}^{-1} \#(S4)$$

The Umklapp phonon-phonon scattering (U),<sup>[6]</sup>

$$\tau_U^{-1} = A_N \frac{\hbar^2 \omega^2 T}{M \nu_s^2 \theta_D} \exp\left(-\frac{\theta_D}{3T}\right) \#(S5)$$

where  $A_N$ ,  $\gamma$ ,  $M$  denote the fitting parameters corresponding to the Umklapp scattering time, Grüneisen parameter and average atomic mass, respectively. The coefficient  $A_N$  can be derived from single-crystal data.<sup>[7]</sup>

The grain boundary scattering (B),<sup>[8]</sup>

$$\tau_B^{-1} = \frac{v}{d} \#(S6)$$

where  $d$  is the average grain size.

The point defect phonon scattering (PD)<sup>[9]</sup>,

$$\tau_{PD}^{-1} = \frac{V\omega^4}{4\pi v^3} (\Gamma_M + \Gamma_S) \#(S7)$$

where  $V$ ,  $\Gamma_M$ ,  $\Gamma_S$  denote the unit atomic volume, mass and strain field fluctuations, respectively. The calculation of mass and strain field fluctuations can be expressed as.<sup>[10]</sup>

$$\Gamma_M = \frac{\sum_{i=1}^n c_i \left( \frac{\overline{M}_i}{\tilde{M}} \right)^2 \Gamma_{M,i}}{\sum_{i=1}^n c_i}, \quad \Gamma_{M,i} = \sum_k f_i^k \left( 1 - \frac{M_i^k}{\overline{M}_i} \right)^2 \#(S8)$$

$$\tilde{M} = \frac{\sum_{i=1}^n c_i \overline{M}_i}{\sum_{i=1}^n c_i} \#(S9)$$

where  $c_i$  is number of atoms on site  $i$ ,  $M_i^k$  and  $f_i^k$  are the mass and fractional occupancy of the  $k$ -th atom,  $\overline{M}_i$  denotes the average mass at site  $i$ , and  $\tilde{M}$  is the average mass of the compound.

$$\Gamma_S = \frac{\sum_{i=1}^n c_i \left( \frac{\overline{M}_i}{\tilde{M}} \right)^2 \varepsilon_i \Gamma_{R,i}}{\sum_{i=1}^n c_i}, \quad \Gamma_{R,i} = \sum_k f_i^k \left( 1 - \frac{R_i^k}{\overline{R}_i} \right)^2 \#(S10)$$

$$\varepsilon_i = \frac{2}{9} \left( 6.4\gamma \frac{1 + \nu_p}{1 - \nu_p} \right)^2 \# (S11)$$

Here,  $R_i^k$  and  $f_i^k$  denote the radius and fractional occupancy of the k-th atom at site  $i$ ,  $\overline{R}_i$  is the average radius at site  $i$ ,  $\varepsilon_i$  is a coefficient determined by the Grüneisen parameter  $\gamma$  and the Poisson ratio  $\nu_p$ .

The dislocations scattering (DC) and strain scattering (DS)<sup>[11]</sup>,

$$\tau_{DC}^{-1} = N_D \frac{V^{\frac{4}{3}} (xk_B T)^3}{v^2 \hbar} \# (S12)$$

$$\tau_{DS}^{-1} = 0.6 \times B_D^2 N_D (\gamma + \Delta\gamma)^2 \frac{xk_B T}{\hbar} \left[ \frac{1}{2} + \frac{1}{24} \left( \frac{1 - 2\nu_p}{1 - \nu_p} \right)^2 \left[ 1 + \sqrt{2} \left( \frac{\nu_l}{\nu_t} \right)^2 \right]^2 \right] \# (S13)$$

$$\Delta\gamma = \frac{V_{Mg3Bi2} C_0 K}{k_B T_a} (\gamma\alpha^2 - \alpha\beta) \# (S14)$$

$$\alpha = \frac{V_{Mg3Sb2} - V_{Mg3Bi2}}{V_{Mg3Bi2}} \# (S15)$$

$$\beta = \frac{M_{Mg3Bi2} - M_{Mg3Sb2}}{2M_{Mg3Bi2}} \# (S16)$$

In this expression,  $N_D$ ,  $B_D$ ,  $C_0$ ,  $K$ ,  $T_a$ ,  $\gamma$ ,  $\nu_p$  represent the dislocation density, Burgers vector,  $Mg_3Sb_2$  fraction in  $Mg_3Sb_{1.5}Bi_{0.5}$ , bulk modulus, sintering temperature, Grüneisen parameter and Poisson ratio, respectively.

The nanoprecipitates (NP)<sup>[12]</sup>,

$$\tau_{NP}^{-1} = v \left[ (2\pi R^2)^{-1} + \left( \frac{4}{9} \pi R^2 (\Delta D/D)^2 (\omega R/v)^4 \right)^{-1} \right]^{-1} N_p \# (S17)$$

where  $N_p$  represents the number density of precipitates,  $R$  represents the average radius for the precipitates,  $D$  is the matrix density and  $\Delta D$  is the density difference between matrix and precipitates.

Debye temperature  $\theta_D$  is calculated by

$$\theta_D = \hbar v (6\pi^2 n)^{1/3} / k_B \# (S18)$$

where  $n$  denote the number of atoms per unit volume.

The mean sound velocity  $v$  is estimated by the longitudinal sound velocity ( $v_l$ ) and transverse sound velocity ( $v_t$ )<sup>[13]</sup>

$$v = \left[ \frac{1}{3} \left( \frac{1}{v_l^3} + \frac{2}{v_t^3} \right) \right]^{-1/3} \#(S19)$$

The necessary parameters for the Debye-Callaway model are listed in Table S3.

### The calculated minimum lattice thermal conductivity

The lower limit of lattice thermal conductivity can be approximated using the diffusive thermal transport model.<sup>[14]</sup>

$$\kappa_{diff} = 0.76 k_B n^{\frac{2}{3}} \frac{1}{3} (2v_t + v_l) \#(S20)$$

where the  $n$ ,  $k_B$ ,  $v_t$ ,  $v_l$  denote the number density of atoms, Boltzmann constant, transverse sound velocity and longitudinal sound velocity, respectively.

### Single Parabolic Band (SPB) model

It is assumed that carrier scattering is mainly governed by acoustic phonon scattering ( $r=-1/2$ ), following the single parabolic band model for semiconductors. The Seebeck coefficient and carrier concentration can then be described as:<sup>[15]</sup>

$$S = \pm \frac{k_B}{e} \left( \frac{\left( r + \frac{5}{2} \right) F_{r + \frac{3}{2}}(\eta)}{\left( r + \frac{3}{2} \right) F_{r + \frac{1}{2}}(\eta)} - \eta \right) \#(S21)$$

$$n = \frac{4\pi(2k_B T m^*)^{\frac{3}{2}}}{h^3} F_{\frac{1}{2}}(\eta) \#(S22)$$

$$F_n(\eta) = \int_0^\infty \frac{x^n}{1 + e^{x-\eta}} dx \#(S23)$$

where the  $\eta$ ,  $k_B$ ,  $m_b^*$  denote reduced chemical potential, Boltzmann constant and band mass of a single Fermi pocket, respectively.

## TE module measurement

The conversion efficiencies are measured using a commercial Advanced Riko Mini-PEM apparatus under steady-state conditions. During measurement, the cold-side temperature is fixed at 300 K, while the hot-side temperature was controlled by the built-in heater. The hot-side temperature ( $T_h$ ), cold-side temperature ( $T_c$ ), electrical output power ( $P_{out}$ ) and output heat flow ( $Q_{out}$ ) record simultaneously, and the conversion efficiency is calculated according to:<sup>[16]</sup>

$$\eta_{max} = \frac{P_{out}}{P_{out} + Q_{out}} \#(S24)$$

Parasitic heat loss is one of the major sources of uncertainty in TE efficiency measurement, and it mainly includes convection and radiation losses. In this work, the device tests are performed under vacuum throughout the measurement, which is a standard and effective way to suppress convection heat loss. However, radiative heat loss cannot be fully eliminated, especially for finite-size devices. For the single-leg measurements, the device cross-sectional area is smaller than the  $10 \times 10 \text{ mm}^2$  base area of the Mini-PEM heat-flow stage. Therefore, for the single-leg measurements, the built-in radiation-calibration function of the commercial Mini-PEM software is applied. By

contrast, for the two-pair module, the device footprint matched the  $10 \times 10 \text{ mm}^2$  stage area and thus no additional radiation correction is required. Regarding uncertainty, based on the commercial calorimetric protocol of the Mini-PEM, an uncertainty of approximately  $\sim 10\%$  exists in the measured heat flow and efficiency values. In addition, we have clarified that the achieved device efficiencies are a direct consequence of the combined effects of: (i) the high broad-temperature thermoelectric performance of the optimized n-type material, including its high near-room-temperature and mid-temperature  $ZT$ ; (ii) the low contact resistance and chemically stable interfaces, which reduce parasitic interfacial losses; and (iii) the device geometry optimized by finite-element numerical simulation.

### Numerical Modelling

Numerical simulations are performed using the commercial COMSOL Multiphysics software, incorporating the Seebeck, Thomson, and Peltier effects as well as Joule heating.<sup>[17, 18]</sup>

$$\nabla(\kappa \nabla T) + \frac{J^2}{\sigma} - TJ \cdot \left[ \left( \frac{\partial S}{\partial T} \right) \nabla T + (\nabla S)_T \right] = 0 \#(S25)$$

$$\nabla \cdot J = 0 \#(S26)$$

$$J = -\sigma(\nabla V + S \nabla T) \#(S27)$$

where  $T$  represents the Kelvin temperature,  $\kappa$  denotes the thermal conductivity,  $\sigma$  is the electrical conductivity,  $S$  stands for the Seebeck coefficient,  $J$  denotes the current density and  $V$  is the electrostatic potential, respectively.

### Weighted mobility calculation

$$\mu_w = 331\sigma \left(\frac{T}{300}\right)^{-\frac{3}{2}} \left[ \frac{\exp\left[\frac{|S|}{k_B} - 2\right]}{1 + \exp\left[-5\left(\frac{|S|}{k_B} - 1\right)\right]} + \frac{\frac{3|S|}{\pi^2 k_B}}{e} \frac{1}{1 + \exp\left[5\left(\frac{|S|}{k_B} - 1\right)\right]} \right] \#(S28)$$

where  $T$ ,  $k_B$ ,  $e$  denote the Kelvin temperature, Boltzmann constant and electron charge.

### Supplemental references

- 1 (Eds: P. Villars, H. Okamoto), Springer-Verlag Berlin Heidelberg & Material Phases Data System (MPDS), Switzerland & National Institute for Materials Science (NIMS), Japan.
- 2 (Eds: P. Villars, H. Okamoto), Springer-Verlag Berlin Heidelberg & Material Phases Data System (MPDS), Switzerland & National Institute for Materials Science (NIMS), Japan.
- 3 M. Ghasemi Hajiabadi, M. Zamanian and D. Souri, *Ceram. Int.*, 2019, **45**, 14084-14089.
- 4 J. Callaway, *Phys. Rev.*, 1959, **113**, 1046-1051.

- 5 F. C. Schwerer, J. W. Conroy and S. Araj, *J. Phys. Chem. Solids*, 1969, **30**, 1513-1525.
- 6 G. A. Slack and S. Galginaitis, *Phys. Rev.*, 1964, **133**, A253-A268.
- 7 Y. Pan, M. Yao, X. Hong, Y. Zhu, F. Fan, K. Imasato, Y. He, C. Hess, J. Fink, J. Yang, B. Büchner, C. Fu, G. J. Snyder and C. Felser, *Energy Environ. Sci.*, 2020, **13**, 1717-1724.
- 8 Z. Wang, J. E. Alaniz, W. Jang, J. E. Garay and C. Dames, *Nano Lett.*, 2011, **11**, 2206-2213.
- 9 P. G. Klemens, *Phys. Rev.*, 1960, **119**, 507-509.
- 10 J. Yang, G. P. Meisner and L. Chen, *Appl. Phys. Lett.*, 2004, **85**, 1140-1142.
- 11 S. I. Kim, K. H. Lee, H. A. Mun, H. S. Kim, S. W. Hwang, J. W. Roh, D. J. Yang, W. H. Shin, X. S. Li, Y. H. Lee, G. J. Snyder and S. W. Kim, *Science*, 2015, **348**, 109-114.
- 12 S. Chen, J. Wei, Z. Kang, X. Miao, D. An, W. Fan and C. Dun, *Chem. Eng. J.*, 2024, **490**, 151404.
- 13 C. L. Wan, W. Pan, Q. Xu, Y. X. Qin, J. D. Wang, Z. X. Qu and M. H. Fang, *Phys. Rev. B*, 2006, **74**, 144109.
- 14 M. T. Agne, R. Hanus and G. J. Snyder, *Energy Environ. Sci.*, 2018, **11**, 609-616.
- 15 J. Mao, H. S. Kim, J. Shuai, Z. Liu, R. He, U. Saparamadu, F. Tian, W. Liu and Z. Ren, *Acta Mater.*, 2016, **103**, 633-642.
- 16 S. Bano, R. Chetty, J. Babu and T. Mori, *Device*, 2024, **2**, 100408.
- 17 A. Nozariasbmarz, R. A. Kishore, B. Poudel, U. Saparamadu, W. Li, R. Cruz and S. Priya, *ACS Appl. Mater. Interfaces*, 2019, **11**, 40107-40113.
- 18 Q. Zhang, J. Liao, Y. Tang, M. Gu, C. Ming, P. Qiu, S. Bai, X. Shi, C. Uher and L. Chen, *Energy Environ. Sci.*, 2017, **10**, 956-963.
